# Supplementary material for: Medium Chain Triglyceride (MCT) Oil Affects the Immunophenotype via Reprogramming of Mitochondrial Respiration in Murine Macrophages
Source: MDPI journal article supplement (doi:10.3390/foods8110553), 2019-11-05
Supplement: s1 [file s1]

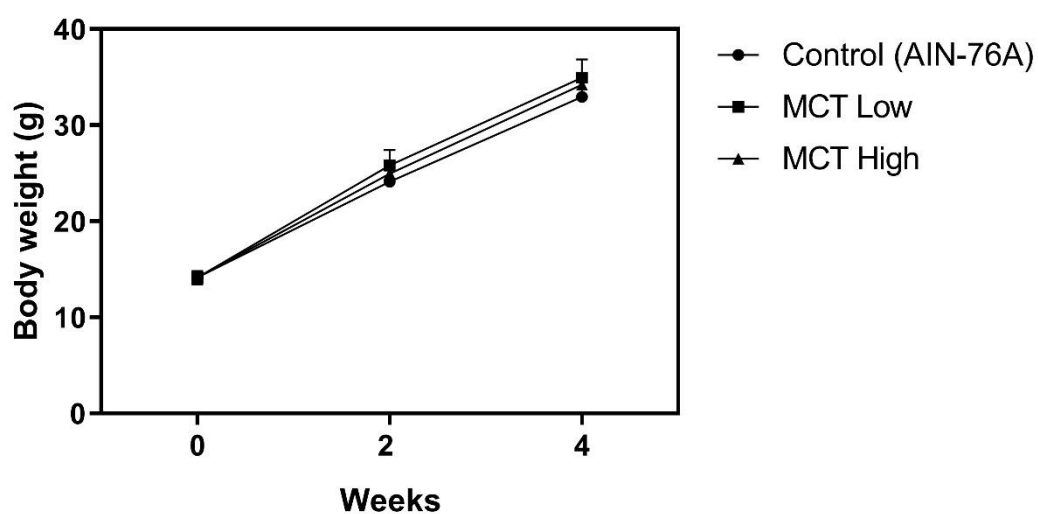

**Figure S1.** Mouse body weight. Each mouse was fed a custom diets and body weight was calculated every 2 weeks. Data are presented as mean $\pm$ SD ( $n = 7$ ).

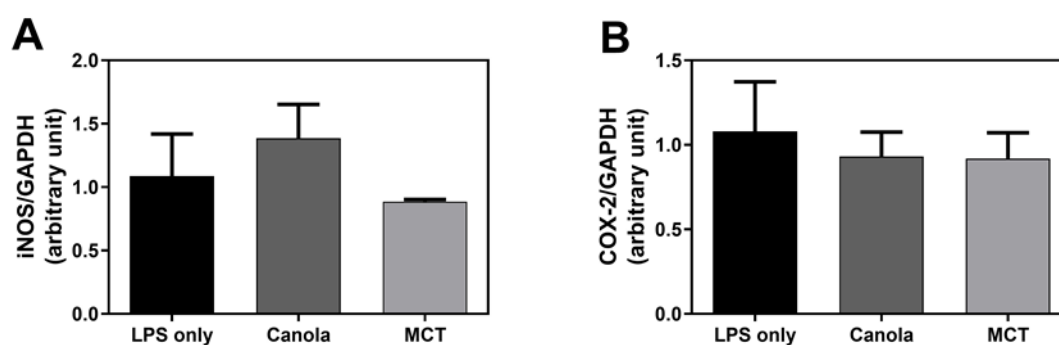

**Figure S2.** Effects of MCT on transcription of pro-inflammatory enzymes in RAW 264.7 macrophages. iNOS (A) and COX-2 (B) mRNA transcription following oil treatment and LPS stimulation. The relative levels of mRNA were determined by qRT-PCR and calculated relative to GAPDH by the  $\Delta\Delta C_t$  method. Data are presented as mean $\pm$ SEM ( $n = 3$ ).
